# Supplementary material for: A bifunctional VS2–Ti3C2 heterostructure electrocatalyst for boosting polysulfide redox in high performance lithium–sulfur batteries
Source: Royal Society of Chemistry journal article supplement (doi:10.1039/d2ta05604f), 2022-01-01
Supplement: d2ta05604f1.pdf [file d2ta05604f1.pdf]

## Supporting Information

### **Bifunctional VS<sub>2</sub>-Ti<sub>3</sub>C<sub>2</sub> Heterostructure Electrocatalyst for Boosting Polysulfide Redox in High Performance Lithium-Sulfur Batteries**

Yueyue Wang,<sup>a</sup> Yuting Xiong,<sup>a</sup> Qingyi Huang,<sup>a</sup> Zixuan Bi,<sup>a</sup> Zexian Zhang,<sup>b</sup> Zhenzhen Guo,<sup>a</sup> Xianbao Wang<sup>a</sup> and Tao Mei<sup>\*a</sup>

<sup>a</sup> *Hubei Collaborative Innovation Center for Advanced Organic Chemical Materials, Overseas, Expertise Introduction Center for Discipline Innovation (D18025), Key Laboratory for the Green Preparation and Application of Functional Materials, Hubei Key Laboratory of Polymer Materials, School of Materials Science and Engineering, Hubei University, Wuhan 430062, PR China \*Email: meitao@hubu.edu.cn*

<sup>b</sup> *School of Materials Science and Engineering, Sun Yat-sen University, Guangzhou 510275, China*

## Contents

### S1 Experimental section

#### S1.1 Chemicals

#### S1.2 Material synthesis

#### S1.3 Materials characterization

#### S1.4 Electrochemical measurements

### S2 Figures and tables

#### S2.1 Figures:

**Figure S1.** (a) XRD date of  $\text{Ti}_3\text{AlC}_2$ . (b) SEM image of  $\text{Ti}_3\text{AlC}_2$ .

**Figure S2.** SEM images of (a)  $\text{Ti}_3\text{C}_2$  and (b)  $\text{VS}_2$ . (c) HR-TEM image of  $\text{VS}_2$ .

**Figure S3.** XRD patterns: (a)  $\text{VS}_2$ , (b)  $\text{Ti}_3\text{C}_2/\text{S}$ , (c)  $\text{VS}_2/\text{S}$ .

**Figure S4.** (a) Raman images of  $\text{VS}_2\text{-Ti}_3\text{C}_2$ ,  $\text{VS}_2$  and  $\text{Ti}_3\text{C}_2$ . (b) XPS spectrum of  $\text{VS}_2\text{-Ti}_3\text{C}_2$ .

**Figure S5.** Electrochemical measurement results, (a) The first four CV curves of symmetric cell with  $\text{VS}_2\text{-Ti}_3\text{C}_2$ . (b, c) Tafel plots calculated from the peak I and II of CV curves based on  $\text{VS}_2\text{-Ti}_3\text{C}_2/\text{S}$  cathode materials. (d) Charge transfer resistance ( $R_2$ ) fitted data of the Nyquist plot of  $\text{VS}_2/\text{S}$ ,  $\text{Ti}_3\text{C}_2/\text{S}$  and  $\text{VS}_2\text{-Ti}_3\text{C}_2/\text{S}$  batteries.

**Figure S6.** (a-f) SEM images of  $\text{VS}_2\text{-Ti}_3\text{C}_2$  cathode and corresponding EDS elemental mapping after 500 cycles at 1 C.

#### S2.2 Tables:

**Table S1.** Titanium, Vanadium, Carbon, Sulfur, Oxygen atomic percent of  $\text{VS}_2\text{-Ti}_3\text{C}_2$  samples.

**Table S2.** Summary of  $D_{\text{Li}^+}$  at peaks I, II, III for  $\text{VS}_2\text{-Ti}_3\text{C}_2/\text{S}$ ,  $\text{VS}_2/\text{S}$  and  $\text{Ti}_3\text{C}_2/\text{S}$  LSBs.

**Table S3.** Summary of recent reports on sulfur host cathodes for LSBs compared to  $\text{VS}_2\text{-Ti}_3\text{C}_2$ .

## **S1 Experimental section**

### **S1.1 Chemicals**

Polyvinylpyrrolidone (PVP), ammonium metavanadate ( $\text{NH}_4\text{VO}_3$ , 99.9%), 1,2-dimethoxymethane (DME, 99%), 1,3-dioxolane (DOL, 99.5%), lithium sulfide ( $\text{Li}_2\text{S}$ , 99.9%), acetylene black, polyvinylidene difluoride (PVDF) were purchased from Macklin Biochemical Co., Ltd (Shanghai, China). Ethanol, ammonium hydroxide and HF were obtained from Sinopharm Chemical Reagent Co. Ltd (China).  $\text{Ti}_3\text{AlC}_2$  was supplied by Shandong Xiyan New Material Technology Co. Ltd. Thioacetamide ( $\text{C}_2\text{H}_5\text{NS}$ , 99.0%), N-methyl pyrrolidone (NMP), Tetraethylene glycol dimethyl ether were purchased from Aladdin Industrial Corporation (Shanghai, China). All the above drugs and reagents were supplied by the market without further purification. The deionized water (DI) was purified from ultrapure water machine (Heal Force, China) when the resistance reaches  $18.25 \text{ M}\Omega\cdot\text{cm}^{-1}$ .

### **S1.2 Material synthesis**

#### **Preparation of $\text{Ti}_3\text{C}_2$ MXene**

$\text{Ti}_3\text{C}_2$  MXene was obtained through the following process. Specifically, 2 g  $\text{Ti}_3\text{AlC}_2$  was carefully and slowly immersed in 20 mL 40% HF solution and the reaction was conducted by continuously stirring for 24 h at 25 °C. Subsequently, the product was centrifuged repeatedly with deionized water until the pH of the supernatant was close to 7. Finally, the sample was freeze-dried for next use.

#### **Synthesis of $\text{VS}_2\text{-Ti}_3\text{C}_2$ and $\text{VS}_2$**

VS<sub>2</sub>-Ti<sub>3</sub>C<sub>2</sub> was synthesized by one-step hydrothermal method. Briefly, 1.0 g of PVP was dissolved in 30 mL deionized water containing 2.0 mL of ammonium hydroxide solution. Then, 0.002 mol NH<sub>4</sub>VO<sub>3</sub> and 0.02 mol C<sub>2</sub>H<sub>5</sub>NS were added into the above solution and being stirred until dissolved. Next step, 0.1 g mL<sup>-1</sup> Ti<sub>3</sub>C<sub>2</sub> aqueous solution was poured in the above solution, being stirred for 30 minutes and the mixture was put into 50 mL hydrothermal reactor. The reaction was conducted at 180 °C for 20 h. After natural cooling, the precipitate was centrifuged with deionized water and ethanol for several times, and finally, The VS<sub>2</sub>-Ti<sub>3</sub>C<sub>2</sub> was obtained after being vacuum-dried at 60 °C. The synthesis steps of VS<sub>2</sub> are consistent with the above-mentioned method, without Ti<sub>3</sub>C<sub>2</sub> dispersion solution.

### **Preparation of VS<sub>2</sub>-Ti<sub>3</sub>C<sub>2</sub>/S, VS<sub>2</sub>/S and Ti<sub>3</sub>C<sub>2</sub>/S composites**

The main host-sulfur composites were obtained by a facile melt diffusion process. In brief, after uniformly mixing the matrix materials (VS<sub>2</sub>-Ti<sub>3</sub>C<sub>2</sub>, VS<sub>2</sub> and Ti<sub>3</sub>C<sub>2</sub>) with sulfur powder in a weight ratio (1:4), they were heated at 155 °C for 12 h in Ar atmosphere.

### **S1.3 Materials characterization**

The crystal structure of the material was analyzed by X-ray diffraction (XRD) (D8-advance diffractometer, Bruker, Germany) with Cu K $\alpha$  radiation. The microstructure of the material was characterized by field emission scanning electron microscope (SEM) (ZEISS, Germany) and transmission electron microscope (TEM) (FEI TECNAI 20, USA). X-ray photoelectron spectroscopy (XPS) (PHOIBOS 150, Germany) was used to analyze the chemical state of elements. Sulfur content was probed using

thermogravimetric analysis technique (TGA) (Diamond TG-DTA, USA) under N<sub>2</sub> atmosphere. UV-vis absorption spectrum was obtained on a UV-3600 Plus spectrometer (UV-3600 Plus, Shimadzu, Japan).

## **S1.4 Electrochemical measurements**

### **Cell assembly and measurements**

To prepare the cathode electrode, the active materials (VS<sub>2</sub>-Ti<sub>3</sub>C<sub>2</sub>/S, VS<sub>2</sub>/S and Ti<sub>3</sub>C<sub>2</sub>/S), PVDF binder and acetylene black were mixed uniformly in NMP at a mass ratio of 7:2:1. The prepared slurry was scraped on carbon-coated aluminum foil, punched into electrode discs with a diameter of 12 mm after vacuum drying at 60 °C for 24 h, which were to be assembled into coin-type half cells (CR 2016). The sulfur content of conventional electrode and high loading electrode was about 1.2 mg cm<sup>-2</sup> and 4 mg cm<sup>-2</sup>, respectively. The electrolyte/sulfur ratio was typically 13.7 μL mg<sup>-1</sup>, but dropped to 9 μL mg<sup>-1</sup> when using cathodes with higher sulfur loadings. Subsequently, lithium sulfur batteries were assembled in an argon-filled glove box. During assembly, metallic lithium foil and Celgard 2400 membrane were used as the anode and separator respectively. The electrolyte was 1.0 M lithium bis(trifluoromethanesulfonyl)imide (LITFSI) with 2 wt% LiNO<sub>3</sub> in DOL and DME (v:v=1:1). Galvanostatic charge-discharge tests were operated on LAND CT2001A (Wuhan, China) in a voltage window of 1.7-2.8 V vs. Li<sup>+</sup>/Li. Cyclic voltammetry (CV) curves were measured using a CHI760E electrochemical workstation at potential range of 1.7-2.8 V and scan rates of 0.1-0.5 mV s<sup>-1</sup>. Electrochemical impedance spectroscopy (EIS) curves with scanning frequency from 0.01 Hz to 10<sup>5</sup> Hz were measured.

### **Preparation of $\text{Li}_2\text{S}_4$ solution and visualized adsorption test**

The  $\text{Li}_2\text{S}_4$  solution was prepared by dissolving  $\text{Li}_2\text{S}$  and sulfur (molar ratio =1:3) in a mixed solution of 1,3-dioxolane (DOL) and 1,2-dimethoxyethane (DME) (v/v =1:1) with continuous stirring at 60 °C for 24 h in a glove box filled with Ar gas. The solution finally presents a homogeneous dark yellowish brown. To evaluate the adsorption performance for polysulfides (LiPSs), 10 mg of active materials ( $\text{VS}_2\text{-Ti}_3\text{C}_2$ ,  $\text{VS}_2$  and  $\text{Ti}_3\text{C}_2$ ) were added to 4 mL 10 mM  $\text{Li}_2\text{S}_4$  solution with 30 s shaking and standing for a period of time. the supernatant was characterized by UV-vis and the precipitate was detected by XPS. The above adsorption experiments were carried out in a glove box filled with Ar gas.

### **$\text{Li}_2\text{S}$ nucleation and decomposition measurement**

The nucleation and dissolution experiments of  $\text{Li}_2\text{S}$  were carried out to study the liquid-solid reaction kinetics. Carbon fiber papers were loaded with about 2.0 mg  $\text{cm}^{-2}$  carrier material ( $\text{VS}_2\text{-Ti}_3\text{C}_2$ ,  $\text{VS}_2$  and  $\text{Ti}_3\text{C}_2$ ) as working electrode and lithium foil as counter electrode. The catholyte contained 25  $\mu\text{L}$  of 1.0 M LiTFSI and 0.2 M  $\text{Li}_2\text{S}_8$  electrolyte, the latter was synthesized by dissolving  $\text{Li}_2\text{S}$  and sulfur with a molar ratio of 1:7 in tetraethylene glycol dimethyl ether at 60 °C and stirring for 24 h. The anolyte was similar to the catholyte, but did not contain  $\text{Li}_2\text{S}_8$ . During nucleation measurements, fresh cells were galvanostatically discharged to 2.07 V at 0.112 mA. Subsequently, the cell was kept at 2.06 V and potentiostatically discharged until the current dropped to  $10^{-5}$  A for  $\text{Li}_2\text{S}$  nucleation and growth. To investigate the decomposition of  $\text{Li}_2\text{S}$ , the assembled fresh battery was first discharged to 1.7 V with the aim of completely

converting sulfur to  $\text{Li}_2\text{S}$ . Then, the battery was charged to 2.5 V under galvanostatic conditions, and held at 2.5 V until the current dropped to  $10^{-5}$  A.

### **Theoretical calculations**

In the Density Functional Theory calculations (DFT), Vienna Ab initio Simulation Package (VASP) with the projector augmented wave (PAW) method was employed.<sup>1,2</sup> The exchange-functional was treated using the Perdew-Burke-Ernzerhof (PBE) functional, in combination with the DFT-D3 correction.<sup>3,4</sup> Further, the cut-off energy of the plane-wave basis was set at 450 eV. For adsorption of  $\text{Li}_2\text{S}$  and  $\text{Li}_2\text{S}_4$  on  $\text{VS}_2\text{-Ti}_3\text{C}_2$   $3\times 3\times 1$  supercell surface, the Brillouin zone integration was performed with  $2\times 2\times 1$  Gamma k-point sampling.<sup>5</sup> The self-consistent calculations applied a convergence energy threshold of  $10^{-5}$  eV. The equilibrium geometries and lattice constants were optimized with maximum stress on each atom within 0.01 eV/Å. The isosurface level of charge density difference was 0.01 e Å<sup>-3</sup>. The adsorption energies ( $E_{\text{ad}}$ ) were calculated by the following formula:

$$E_{\text{ad}} = E_{\text{total}} - (E_{\text{LiPSs}} + E_{\text{sub}})$$

where  $E_{\text{total}}$  was the total energy of the configuration with LiPSs,  $E_{\text{LiPSs}}$  and  $E_{\text{sub}}$  were the energies of isolated LiPSs species and  $\text{VS}_2\text{-Ti}_3\text{C}_2$ , respectively.

## S2 Figures and tables

### S2.1 Figures:

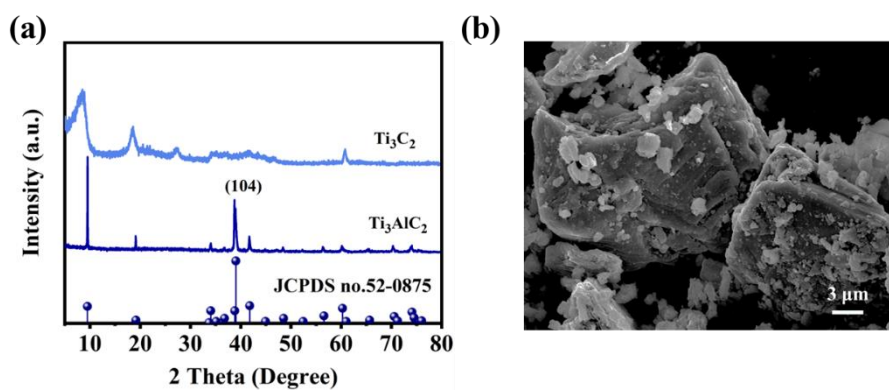

**Figure S1.** (a) XRD date of  $\text{Ti}_3\text{AlC}_2$ . (b) SEM image of  $\text{Ti}_3\text{AlC}_2$ .

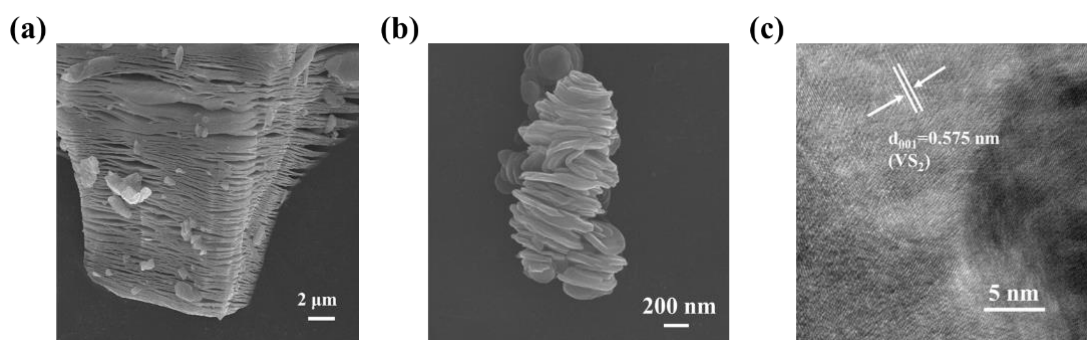

**Figure S2.** SEM images of (a)  $\text{Ti}_3\text{C}_2$  and (b)  $\text{VS}_2$ . (c) HR-TEM image of  $\text{VS}_2$ .

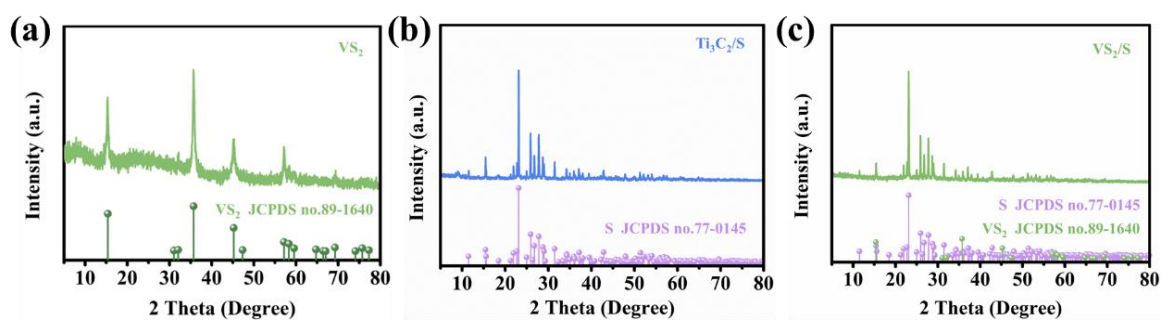

**Figure S3.** XRD patterns: (a)  $\text{VS}_2$ , (b)  $\text{Ti}_3\text{C}_2/\text{S}$ , (c)  $\text{VS}_2/\text{S}$ .



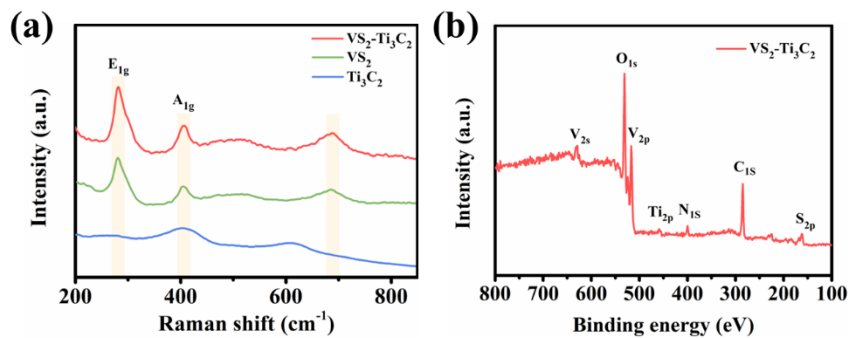

**Figure S4.** (a) Raman images of VS<sub>2</sub>-Ti<sub>3</sub>C<sub>2</sub>, VS<sub>2</sub> and Ti<sub>3</sub>C<sub>2</sub>. (b) XPS spectrum of VS<sub>2</sub>-Ti<sub>3</sub>C<sub>2</sub>.

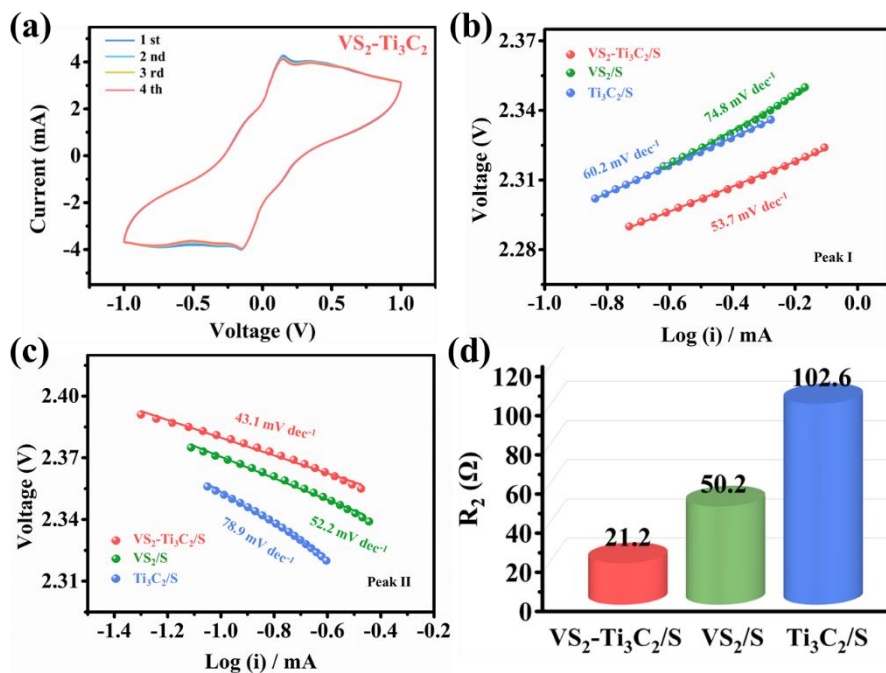

**Figure S5.** Electrochemical measurement results, (a) The first four CV curves of symmetric cell with VS<sub>2</sub>-Ti<sub>3</sub>C<sub>2</sub>. (b, c) Tafel plots calculated from the peak I and II of CV curves based on VS<sub>2</sub>-Ti<sub>3</sub>C<sub>2</sub>/S cathode materials. (d) Charge transfer resistance (R<sub>2</sub>) fitted data of the Nyquist plot of VS<sub>2</sub>/S, Ti<sub>3</sub>C<sub>2</sub>/S and VS<sub>2</sub>-Ti<sub>3</sub>C<sub>2</sub>/S batteries.

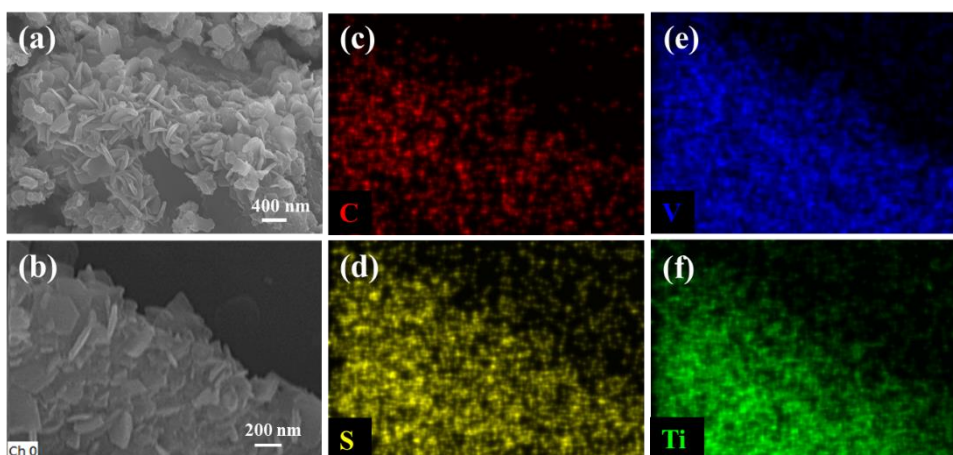

**Figure S6.** (a-f) SEM images of  $\text{VS}_2\text{-Ti}_3\text{C}_2$  cathode and corresponding EDS elemental mapping for C, S, V, and Ti elements after 500 cycles at 1 C.

## S2.2 Tables:

**Table S1.** Titanium, Vanadium, Carbon, Sulfur, Oxygen atomic percent of  $\text{VS}_2\text{-Ti}_3\text{C}_2$  samples.

| Sample                              | Ti (%) | V (%) | C (%) | S (%) | O (%) |
|-------------------------------------|--------|-------|-------|-------|-------|
| $\text{VS}_2\text{-Ti}_3\text{C}_2$ | 30.74  | 17.01 | 22.58 | 25.91 | 3.76  |

**Table S2.** Summary of  $D_{\text{Li}^+}$  at peaks I, II, III for  $\text{VS}_2\text{-Ti}_3\text{C}_2/\text{S}$ ,  $\text{VS}_2/\text{S}$  and  $\text{Ti}_3\text{C}_2/\text{S}$  based LSBs.

| CV peak  | $\text{VS}_2\text{-Ti}_3\text{C}_2/\text{S}$       | $\text{VS}_2/\text{S}$                             | $\text{Ti}_3\text{C}_2/\text{S}$                   |
|----------|----------------------------------------------------|----------------------------------------------------|----------------------------------------------------|
| Peak I   | $3.082 \times 10^{-7} \text{ cm}^2 \text{ s}^{-1}$ | $2.405 \times 10^{-7} \text{ cm}^2 \text{ s}^{-1}$ | $2.036 \times 10^{-7} \text{ cm}^2 \text{ s}^{-1}$ |
| Peak II  | $1.201 \times 10^{-7} \text{ cm}^2 \text{ s}^{-1}$ | $1.468 \times 10^{-7} \text{ cm}^2 \text{ s}^{-1}$ | $7.931 \times 10^{-8} \text{ cm}^2 \text{ s}^{-1}$ |
| Peak III | $1.394 \times 10^{-7} \text{ cm}^2 \text{ s}^{-1}$ | $1.401 \times 10^{-7} \text{ cm}^2 \text{ s}^{-1}$ | $6.525 \times 10^{-8} \text{ cm}^2 \text{ s}^{-1}$ |

**Table S3.** Summary of recent reports on sulfur host cathodes for LSBs compared to VS<sub>2</sub>-Ti<sub>3</sub>C<sub>2</sub>.

| Host material                                                    | Specific capacity<br>(mAh g <sup>-1</sup> ) | (cycles, current<br>rate) | Area sulfur<br>loading<br>(mg cm <sup>-2</sup> ) | Decay rate<br>(per cycle, %) | Ref              |
|------------------------------------------------------------------|---------------------------------------------|---------------------------|--------------------------------------------------|------------------------------|------------------|
| TSC/NbC                                                          | 937.9                                       | 500,0.1C                  | 2                                                | 0.037                        | 6                |
| NbS <sub>2</sub> @S@IG                                           | 856                                         | 350,0.5C                  | 1.05                                             | 0.07                         | 7                |
| MoSe <sub>2</sub> @MoO <sub>2</sub>                              | 848                                         | 500,0.5C                  | 2.3                                              | 0.046                        | 8                |
| Co <sub>9</sub> S <sub>8</sub> @MoS <sub>2</sub>                 | 794                                         | 400,1C                    | 3                                                | 0.091                        | 9                |
| TiO <sub>2</sub> 30-CNFs                                         | 723                                         | 500,1C                    | 1.5~2                                            | 0.041                        | 10               |
| NiCo <sub>2</sub> S <sub>4</sub> @NSCC                           | 710                                         | 500,1C                    | 2.0                                              | 0.046                        | 11               |
| MCS@Nb <sub>2</sub> O <sub>5</sub>                               | 650                                         | 500,2C                    | ~1.5                                             | 0.091                        | 12               |
| Ti <sub>3</sub> C <sub>2</sub> T <sub>x</sub> -CNTs              | 621                                         | 500,1C                    | 1.6                                              | 0.062                        | 13               |
| Ti <sub>3</sub> C <sub>2</sub> /C                                | 530                                         | 500,1C                    | 1                                                | 0.05                         | 14               |
| MNSs@d-Ti <sub>3</sub> C <sub>2</sub>                            | 501                                         | 500,1C                    | 1.2                                              | 0.06                         | 15               |
| H-LDH/Co <sub>9</sub> S <sub>8</sub>                             | 450                                         | 500,1C                    | 1.5~2                                            | 0.073                        | 16               |
| N-CN@Co <sub>3</sub> Se <sub>4</sub>                             | 531                                         | 800,0.2C                  | ~3.1                                             | 0.067                        | 17               |
| ZnCo <sub>2</sub> O <sub>4</sub> @Ti <sub>3</sub> C <sub>2</sub> | 306                                         | 400,0.5C                  | 1.0~1.5                                          | 0.183                        | 18               |
| S@NG/WSe <sub>2</sub>                                            | 750.4                                       | 500,1C                    | 1                                                | 0.037                        | 19               |
| Co-PC@S                                                          | 798                                         | 500,1C                    | 2                                                | 0.059                        | 20               |
| S/ZnSe-CoSe <sub>2</sub> @NC                                     | 619.4                                       | 400,1C                    | 1.23                                             | 0.077                        | 21               |
| CoNiO <sub>2</sub> /Co <sub>4</sub> N-G-S                        | 389                                         | 600,4C                    | 1                                                | 0.07                         | 22               |
| w-MXene/rGo                                                      | 837                                         | 200,1C                    | 3.43                                             | 0.071                        | 23               |
| MoSe <sub>2</sub> @C/rGO/S                                       | 585                                         | 300,1C                    | 1.2~1.5                                          | 0.1                          | 24               |
| STMn0.3                                                          | 634                                         | 500,1C                    | 1                                                | 0.0656                       | 25               |
| GL800/S                                                          | 631.4                                       | 350,0.5C                  | 1                                                | 0.079                        | 26               |
| <b>VS<sub>2</sub>-Ti<sub>3</sub>C<sub>2</sub></b>                | <b>919</b>                                  | <b>500,1C</b>             | 1.2                                              | <b>0.024</b>                 | <b>This work</b> |

## References

1. J. Hafner, *J. Comput. Chem.*, 2008, **29**, 2044-2078.
2. P. E. Blöchl, *Phys. Rev. B*, 1994, **50**, 17953.
3. J. P. Perdew, K. Burke and M. Ernzerhof, *Phys. Rev. Lett.*, 1996, **77**, 3865.
4. S. Grimme, *J. Comput. Chem.*, 2006, **27**, 1787.
5. H. J. Monkhorst and J. D. Pack, *Phys. Rev. B*, 1976, **13**, 5188.

6. R. Hou, S. Zhang, P. Zhang, Y. Zhang, X. Zhang, N. Li, Z. Shi and G. Shao, *J. Mater. Chem. A*, 2020, **8**, 25255-25267.
7. S. Shen, X. Xia, Y. Zhong, S. Deng, D. Xie, B. Liu, Y. Zhang, G. Pan, X. Wang and J. Tu, *Adv. Mater.*, 2019, **31**, 1900009.
8. Z. Xiao, Z. Yang, L. Zhang, H. Pan and R. Wang, *ACS Nano*, 2017, **11**, 8488-8498.
9. Q. Hao, G. Cui, Y. Zhang, J. Li and Z. Zhang, *Chem. Eng. J.*, 2020, **381**, 122672.
10. B. Li, Q. Su, L. Yu, J. Zhang, G. Du, D. Wang, D. Han, M. Zhang, S. Ding and B. Xu, *ACS Nano*, 2020, **14**, 17285-17294.
11. T. Sun, C. Huang, H. Shu, L. Luo, Q. Liang, M. Chen, J. Su and X. Wang, *ACS Appl. Mater. Interfaces*, 2020, **12**, 57975-57986.
12. Y. Tao, Y. Wei, Y. Liu, J. Wang, W. Qiao, L. Ling and D. Long, *Energy Environ. Sci.*, 2016, **9**, 3230-3239.
13. M. Xu, L. Liang, J. Qi, T. Wu, D. Zhou and Z. Xiao, *Small*, 2021, **17**, 2007446.
14. H.Y. Zhou, Z.Y. Sui, K. Amin, L.W. Lin, H.Y. Wang and B. H. Han, *ACS Appl. Mater. Interfaces*, 2020, **12**, 13904-13913.
15. H. Zhang, Q. Qi, P. Zhang, W. Zheng, J. Chen, A. Zhou, W. Tian, W. Zhang and Z. Sun, *ACS Appl. Mater. Interfaces*, 2018, **2**, 705-714.
16. S. Chen, J. Luo, N. Li, X. Han, J. Wang, Q. Deng, Z. Zeng and S. Deng, *Energy Storage Mater.*, 2020, **30**, 187-195.
17. D. Cai, B. Liu, D. Zhu, D. Chen, M. Lu, J. Cao, Y. Wang, W. Huang, Y. Shao, H. Tu and W. Han, *Adv. Energy. Mater.*, 2020, **10**, 1904273.
18. A. Wei, L. Wang and Z. Li, *J. Alloys Compd.*, 2022, **899**, 163369.
19. C. Q. Zhang, B. Fei, D. W. Yang, H. B. Zhan, J. A. Wang, J. F. Diao, J. S. Li, G. Henkelman, D. P. Cai, J. J. Biendicho, J. R. Morante and A. Cabot, *Adv. Funct. Mater.*, 2022, **32**, 2201322.
20. 20 Y. F. Xue, D. Luo, N. Yang, G. Ma, Z. Zhang, J. F. Hou, J. T. Wang, C. Y. Ma, X. Wang, M. L. Jin, Z. W. Chen and L. L. Shui, *Chem. Eng. J.*, 2022, **440**, 135990.

21. J. Xu, L. L. Xu, Z. L. Zhang, B. Sun, Y. Jin, Q. Z. Jin, H. Liu and G. X. Wang, *Energy Storage Mater.*, 2022, **47**, 223-234.
22. J. Pu, W. B. Gong, Z. X. Shen, L. T. Wang, Y. G. Yao and G. Hong, *Adv. Sci.*, 2022, **9**, 2104375
23. C. Y. Zhang, W. Chu, X. F. Hong, Q. He, R. H. Lu, X. B. Liao and Y. Zhao, *Chem. Eng. J.*, 2022, **439**, 135679.
24. C. C. Li, W. N. Ge, S. Y. Qi, L. Zhu, R. Z. Huang, M. W. Zhao, Y. T. Qian and L. Q. Xu, *Adv. Energy. Mater.*, 2022, **12**, 2103915.
25. W. S. Hou, P. L. Feng, X. Guo, Z. H. Wang, Z. Bai, Y. Bai, G. X. Wang, and K. N. Sun, *Adv. Mater.*, 2022, **34**, 2202222.
26. J. Q. Cui, J. Liu, X. Chen, J. S. Meng, S. Y. Wei, T. Wu, Y. Wang, Y. M. Xie, C. Z. Lu and X. C. Zhang, *Carbon*, 2022, **196**, 70-77.
